# Supplementary material
Source: PubMed Central journal article supplement (PMC2535570)
Supplement: NIHMS62495-supplement-File0021.pdf [file NIHMS62495-supplement-File0021.pdf]

## Supporting Information

# XAS Characterization of a Nitridoiron(IV) Complex with a Very Short Fe–N Bond

Jan-Uwe Rohde,<sup>†,‡</sup> Theodore A. Betley,<sup>§,||</sup> Timothy A. Jackson,<sup>†</sup>  
Caroline T. Saouma,<sup>§</sup> Jonas C. Peters,<sup>§</sup> and Lawrence Que, Jr.<sup>†</sup>

<sup>†</sup> *Department of Chemistry and Center for Metals in Biocatalysis, University of Minnesota,  
Minneapolis, MN 55455, USA*

<sup>‡</sup> *Current address: Department of Chemistry, The University of Iowa, Iowa City, IA 52242, USA*

<sup>§</sup> *Department of Chemistry and Chemical Engineering, Arnold and Mabel Beckman Laboratories  
of Chemical Synthesis, California Institute of Technology, Pasadena, CA 91125, USA*

<sup>||</sup> *Current address: Department of Chemistry, Massachusetts Institute of Technology, Cambridge,  
MA 02139, USA*

page

- S3** **Table S1.** XAS pre-edge peak energies and intensities.
- S4** **Figure S1.** Fe K-edge EXAFS spectra ( $k^3\chi(k)$ ) of **1**, **2**, **3**, and three samples of **4**.
- S5** **Table S2.** EXAFS fitting results for **2**, **3**, and **1**.
- S5** **Table S3.** Distances in **2**, **3**, and **1** revealed by crystal structure determination.
- S6** **Figure S2.** Fourier transform of the Fe K-edge EXAFS data and Fourier-filtered EXAFS spectrum of  $[\text{PhBP}^{i\text{Pr}}_3]\text{Fe}(\text{NPh}_2)$ , **2**; experimental data and best fit.
- S6** **Figure S3.** Fourier transform of the Fe K-edge EXAFS data and Fourier-filtered EXAFS spectrum of  $[\text{PhBP}^{i\text{Pr}}_3]\text{Fe}(\text{NAd})$ , **3**; experimental data and best fit.
- S7** **Figure S4.** Fourier transform of the Fe K-edge EXAFS data and Fourier-filtered EXAFS spectrum of  $\{[\text{PhBP}^{i\text{Pr}}_3]\text{Fe}\}_2(\mu\text{-N}_2)$ , **1**; experimental data and best fit.
- S8** **Table S4.** EXAFS fitting results for a sample of **4** (**4A**,  $[\text{Fe}] = 0.01 \text{ M}$ ).
- S9** **Table S5.** EXAFS fitting results for a second sample of **4** (**4B**,  $[\text{Fe}] = 0.03 \text{ M}$ ).
- S10** **Figure S5.** Fourier transforms of the Fe K-edge EXAFS data and Fourier-filtered EXAFS spectra of additional samples of  $[\text{PhBP}^{i\text{Pr}}_3]\text{Fe}(\text{N})$ , **4** ( $[\text{Fe}] = 0.03 \text{ M}$ ); experimental data and best fits; comparison of the Fourier transforms of the Fe K-edge EXAFS data of samples **4A** ( $[\text{Fe}] = 0.01 \text{ M}$ ) and **4B** ( $[\text{Fe}] = 0.03 \text{ M}$ ).
- S11** **Table S6.** EXAFS fitting results for a sample of **5** ( $[\text{Fe}] = 0.035 \text{ M}$ ).

**Table S1.** XAS pre-edge peak energies and intensities for the [PhBP<sup>iPr</sup><sub>3</sub>]Fe(N<sub>x</sub>) complexes in this study from refinements with multiple peaks.<sup>a</sup>

| complex               | $E_0$ (eV) | $E_{\text{pre-edge}}$ (eV) | area | $E_{\text{pre-edge}}$ (eV)<br>(centroids) | total area |
|-----------------------|------------|----------------------------|------|-------------------------------------------|------------|
| <b>1</b>              | 7117.3     | 7112.2                     | 13.3 | 7112.6                                    | 16.8       |
|                       |            | 7113.9                     | 3.5  |                                           |            |
| <b>2</b>              | 7119.0     | 7111.1                     | 2.0  | 7112.4                                    | 24.5       |
|                       |            | 7112.3                     | 17.1 |                                           |            |
|                       |            | 7113.4                     | 5.4  |                                           |            |
| <b>3</b>              | 7118.0     | 7111.6                     | 7.9  | 7112.4                                    | 16.2       |
|                       |            | 7113.1                     | 8.3  |                                           |            |
| <b>4A</b> (0.01 M Fe) | 7120.2     | 7111.6                     | 4.9  | 7113.1                                    | 64.5       |
|                       |            | 7113.2                     | 59.6 |                                           |            |
| <b>4B</b> (0.03 M Fe) | 7120.0     | 7111.7                     | 7.7  | 7112.8                                    | 59.8       |
|                       |            | 7113.0                     | 52.1 |                                           |            |

<sup>a</sup>  $E_0$  is conventionally defined as the first inflection point of the Fe K-edge. Pre-edge peak intensities are reported as peak areas (normalized to the edge jump) and were multiplied by 100.

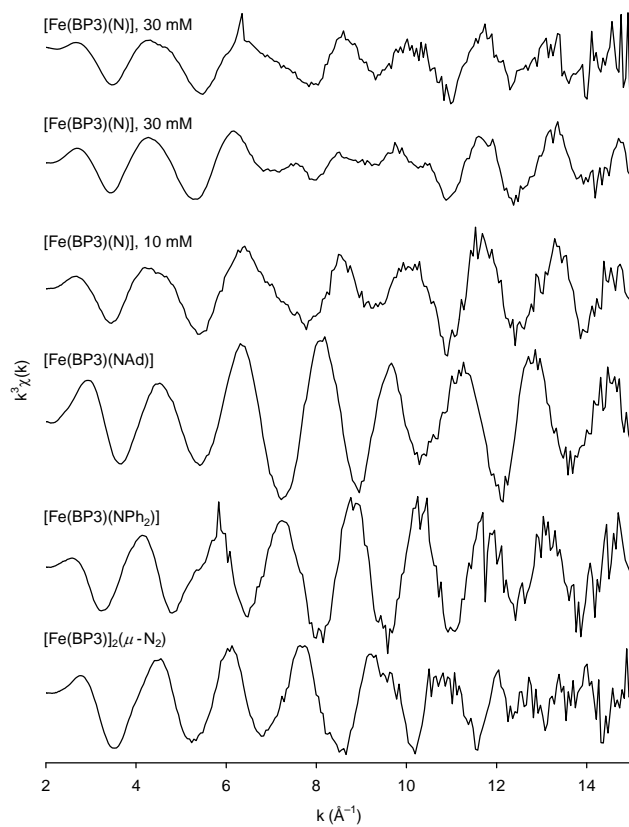

**Figure S1.** Fe K-edge EXAFS spectra ( $k^3 \chi(k)$ ) of  $\{[\text{PhBP}^{i\text{Pr}}_3\text{Fe}]_2(\mu\text{-N}_2)$ , **1**,  $[\text{PhBP}^{i\text{Pr}}_3\text{Fe}(\text{NPh}_2)$ , **2**,  $[\text{PhBP}^{i\text{Pr}}_3\text{Fe}(\text{NAd})$ , **3**, and three samples of  $[\text{PhBP}^{i\text{Pr}}_3\text{Fe}(\text{N})$ , **4**.

**Table S2.** EXAFS fitting results for [PhBP<sup>iPr</sup><sub>3</sub>]Fe(NPh<sub>2</sub>), **2**, [PhBP<sup>iPr</sup><sub>3</sub>]Fe(NAd), **3**, and {[PhBP<sup>iPr</sup><sub>3</sub>]Fe}<sub>2</sub>(μ-N<sub>2</sub>), **1**.<sup>a</sup>

| Fit          | Fe–N     |              |                  | Fe–P     |              |                  | Fe···C   |              |                  | Fe···C   |              |                  | GOF<br>$\varepsilon^2 \cdot 10^3$ <sup>b</sup> |
|--------------|----------|--------------|------------------|----------|--------------|------------------|----------|--------------|------------------|----------|--------------|------------------|------------------------------------------------|
|              | <i>n</i> | <i>r</i> (Å) | $\Delta\sigma^2$ |                                                |
| <b>1</b>     | <b>1</b> | <b>1.959</b> | <b>2.5</b>       | <b>3</b> | <b>2.463</b> | <b>0.6</b>       | <b>2</b> | <b>2.938</b> | <b>0.9</b>       |          |              |                  | <b>0.512</b>                                   |
| ( <i>l</i> ) | <i>l</i> | 1.959        | 2.8              | 3        | 2.463        | 0.6              | 2        | 2.936        | 0.6              |          |              |                  | 0.686) <sup>c</sup>                            |
| 2            | 1        | 1.961        | 2.8              | 3        | 2.463        | 0.7              |          |              |                  |          |              |                  | 0.656                                          |
| 3            |          |              |                  | 3        | 2.463        | 0.7              | 2        | 2.935        | 1.4              |          |              |                  | 0.709                                          |
| 4            |          |              |                  | 3        | 2.463        | 0.8              |          |              |                  |          |              |                  | 0.779                                          |
| <b>1</b>     | <b>1</b> | <b>1.637</b> | <b>0.7</b>       | <b>3</b> | <b>2.269</b> | <b>0.9</b>       | <b>1</b> | <b>3.163</b> | <b>-2.9</b>      | <b>3</b> | <b>3.443</b> | <b>4</b>         | <b>0.528</b>                                   |
| ( <i>l</i> ) | <i>l</i> | 1.636        | 0.8              | 3        | 2.269        | 0.8              | <i>l</i> | 3.168        | -2.9             | 3        | 3.454        | 3.9              | 0.696) <sup>c</sup>                            |
| 2            | 1        | 1.638        | 0.7              | 3        | 2.269        | 0.9              | 1        | 3.163        | -3.2             |          |              |                  | 0.612                                          |
| 3            | 1        | 1.636        | 0.6              | 3        | 2.269        | 0.9              |          |              |                  | 3        | 3.436        | 1.1              | 0.609                                          |
| 4            | 1        | 1.637        | 0.6              | 3        | 2.269        | 1.0              |          |              |                  |          |              |                  | 0.668                                          |
| 5            |          |              |                  | 3        | 2.268        | 0.8              | 1        | 3.167        | -3.3             | 3        | 3.44         | 5                | 1.112                                          |
| 6            |          |              |                  | 3        | 2.269        | 0.9              |          |              |                  |          |              |                  | 1.122                                          |
| <b>1</b>     | <b>1</b> | <b>1.794</b> | <b>4.1</b>       | <b>3</b> | <b>2.352</b> | <b>3.8</b>       |          |              |                  |          |              |                  | <b>0.557</b>                                   |
| ( <i>l</i> ) | <i>l</i> | 1.789        | 5.1              | 3        | 2.353        | 3.8              |          |              |                  |          |              |                  | 0.818) <sup>c</sup>                            |
| 2            |          |              |                  | 3        | 2.351        | 3.8              |          |              |                  |          |              |                  | 0.725                                          |

<sup>a</sup> Fourier-transformed range **1**, **2**, and **3**:  $k = 2-15 \text{ \AA}^{-1}$  (resolution 0.12 Å). *r* is in units Å,  $\Delta\sigma^2$  in  $10^3 \text{ \AA}^2$ . The typical error of analysis for interatomic distances (*r*) is approximately  $\pm 0.02 \text{ \AA}$ . <sup>b</sup> Back-transformation ranges for **2**:  $r' = 0.80-3.80 \text{ \AA}$ ; for **3**:  $r' = 0.60-3.80 \text{ \AA}$ ; and for **1**:  $r' = 0.60-3.60 \text{ \AA}$ . <sup>c</sup> Fits to unfiltered data corresponding to the best fits to filtered data.

**Table S3.** Distances (Å) in **2**, **3**, and **1** revealed by crystal structure determination.

|                     | <b>2</b>                |         | <b>3</b>                |         | <b>1</b>              |         |
|---------------------|-------------------------|---------|-------------------------|---------|-----------------------|---------|
|                     | <i>d</i> (Å)            | average | <i>d</i> (Å)            | average | <i>d</i> (Å)          | average |
| Fe–N                | 1.953                   |         | 1.638                   |         | 1.761–1.818<br>(4 x)  | 1.793   |
| Fe–P                | 2.443<br>2.462<br>2.467 | 2.457   | 2.260<br>2.263<br>2.297 | 2.273   | 2.333–2.394<br>(12 x) | 2.357   |
| Fe···C <sup>a</sup> | 2.936<br>2.982          | 2.959   | 3.074                   |         |                       |         |
| Fe···C <sup>b</sup> | 3.434–3.733<br>(9 x)    | 3.592   | 3.366–3.545<br>(9 x)    | 3.45    |                       |         |

<sup>a</sup> *Ips*o carbon atoms of the *N*-phenyl (**2**) and *N*-adamantyl substituents (**3**). <sup>b</sup> Carbon atoms adjacent to the ligating phosphorus atoms.

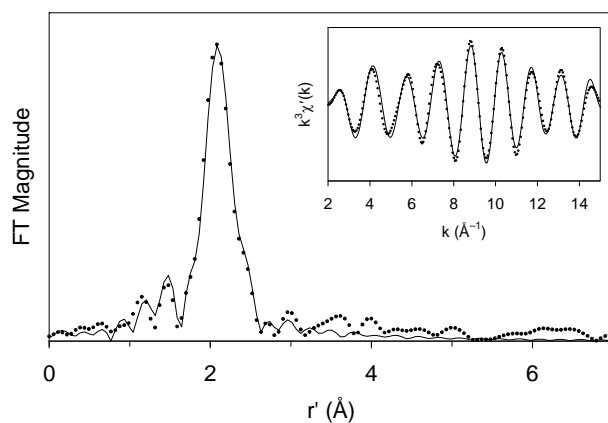

**Figure S2.** Fourier transform of the Fe K-edge EXAFS data ( $k^3\chi(k)$ ) and Fourier-filtered EXAFS spectrum ( $k^3\chi'(k)$ , inset) of  $[\text{PhBP}^{i\text{Pr}}_3]\text{Fe}(\text{NPh}_2)$ , **2**, Fourier-transformed range  $k = 2\text{--}15 \text{ \AA}^{-1}$ ; experimental data ( $\bullet\bullet\bullet$ ) and fit 1, Table S2 (—); Back-transformation range:  $r' = 0.80\text{--}3.80 \text{ \AA}$ .

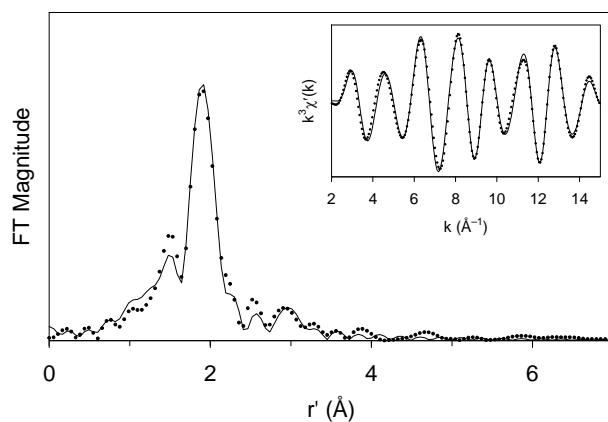

**Figure S3.** Fourier transform of the Fe K-edge EXAFS data ( $k^3\chi(k)$ ) and Fourier-filtered EXAFS spectrum ( $k^3\chi'(k)$ , inset) of  $[\text{PhBP}^{i\text{Pr}}_3]\text{Fe}(\text{NAd})$ , **3**, Fourier-transformed range  $k = 2\text{--}15 \text{ \AA}^{-1}$ ; experimental data ( $\bullet\bullet\bullet$ ) and fit 1, Table S2 (—); Back-transformation range:  $r' = 0.60\text{--}3.80 \text{ \AA}$ .

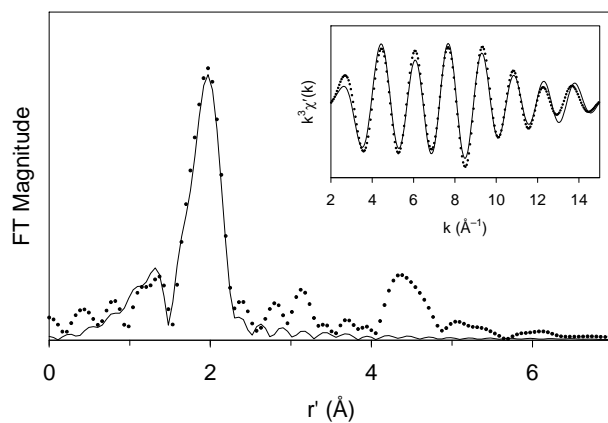

**Figure S4.** Fourier transform of the Fe K-edge EXAFS data ( $k^3\chi(k)$ ) and Fourier-filtered EXAFS spectrum ( $k^3\chi'(k)$ , inset) of  $\{[\text{PhBP}^{i\text{Pr}}_3]\text{Fe}\}_2(\mu\text{-N}_2)$ , **1**, Fourier-transformed range  $k = 2\text{--}15 \text{ \AA}^{-1}$ ; experimental data ( $\bullet\bullet$ ) and fit 1, Table S2 (—); Back-transformation range:  $r' = 0.60\text{--}3.60 \text{ \AA}$ .

**Table S4.** EXAFS fitting results for a sample of [PhBP<sup>i</sup>Pr<sub>3</sub>]Fe(N), **4 (4A)**, [Fe] = 0.01 M).<sup>a</sup>

| Fit       | Fe-N       |              |                  | Fe-N       |              |                  | Fe-P       |              |                  | Fe-P       |              |                  | Fe···C   |              |                  | GOF<br>$\epsilon^2 \cdot 10^3$ <sup>b</sup> |
|-----------|------------|--------------|------------------|------------|--------------|------------------|------------|--------------|------------------|------------|--------------|------------------|----------|--------------|------------------|---------------------------------------------|
|           | <i>n</i>   | <i>r</i> (Å) | $\Delta\sigma^2$ | <i>n</i> | <i>r</i> (Å) | $\Delta\sigma^2$ |                                             |
| 1         |            |              |                  |            |              |                  | 3          | 2.210        | 6.0              |            |              |                  |          |              |                  | 1.744                                       |
| 2         |            |              |                  |            |              |                  | 2          | 2.216        | 2.5              | 1          | 2.442        | -0.5             |          |              |                  | 0.934                                       |
| 3         |            |              |                  |            |              |                  | 1.5        | 2.210        | 0.3              | 1.5        | 2.434        | 2.7              |          |              |                  | 0.885                                       |
| 4         |            |              |                  |            |              |                  | 1          | 2.203        | -1.6             | 2          | 2.418        | 8.1              |          |              |                  | 0.951                                       |
| 5         | 1          | 1.510        | 4.3              |            |              |                  | 1.5        | 2.209        | 0.2              | 1.5        | 2.432        | 2.9              |          |              |                  | 0.816                                       |
| 6         | 0.5        | 1.515        | 0.2              |            |              |                  | 1.5        | 2.209        | 0.1              | 1.5        | 2.431        | 2.8              |          |              |                  | 0.671                                       |
| 7         |            |              |                  | 1          | 2.05         | 9                | 1.5        | 2.208        | 0.7              | 1.5        | 2.441        | 2.4              |          |              |                  | 0.842                                       |
| 8         |            |              |                  | 0.5        | 2.03         | 1                | 1.5        | 2.214        | 0.7              | 1.5        | 2.441        | 2.1              |          |              |                  | 0.854                                       |
| 9         | 0.55       | 1.517        | 0.8              | 0.45       | 2.02         | 4                | 1.65       | 2.213        | 1.0              | 1.35       | 2.439        | 1.3              |          |              |                  | 0.600                                       |
| <b>10</b> | <b>0.5</b> | <b>1.518</b> | <b>0.2</b>       | <b>0.5</b> | <b>2.00</b>  | <b>4</b>         | <b>1.5</b> | <b>2.212</b> | <b>0.3</b>       | <b>1.5</b> | <b>2.435</b> | <b>2.3</b>       |          |              |                  | <b>0.573</b>                                |
| 11        | 0.45       | 1.518        | -0.3             | 0.55       | 1.98         | 3                | 1.35       | 2.211        | -0.4             | 1.65       | 2.432        | 3.4              |          |              |                  | 0.558                                       |
| <b>12</b> | <b>0.5</b> | <b>1.518</b> | <b>0.3</b>       | <b>0.5</b> | <b>2.00</b>  | <b>4</b>         | <b>1.5</b> | <b>2.212</b> | <b>0.3</b>       | <b>1.5</b> | <b>2.435</b> | <b>2.4</b>       | <b>1</b> | <b>3.03</b>  | <b>9</b>         | <b>0.555</b>                                |
|           |            |              |                  |            |              |                  |            |              |                  |            |              |                  | <b>3</b> | <b>3.470</b> | <b>2.2</b>       |                                             |
|           |            |              |                  |            |              |                  |            |              |                  |            |              |                  | <b>3</b> | <b>3.71</b>  | <b>5</b>         |                                             |
| (12)      | 0.5        | 1.523        | 0.7              | 0.5        | 2.025        | 0.1              | 1.5        | 2.216        | 0.9              | 1.5        | 2.443        | 2.1              | 1        | 3.02         | 8                | 0.602) <sup>c</sup>                         |
|           |            |              |                  |            |              |                  |            |              |                  |            |              |                  | 3        | 3.470        | 1.0              |                                             |
|           |            |              |                  |            |              |                  |            |              |                  |            |              |                  | 3        | 3.702        | 3.4              |                                             |
| 13        | 0.5        | 1.515        | 0.3              |            |              |                  | 1.5        | 2.209        | 0.1              | 1.5        | 2.431        | 2.9              | 0.7      | 3.08         | 3                | 0.693                                       |
|           |            |              |                  |            |              |                  |            |              |                  |            |              |                  | 3        | 3.473        | 2.0              |                                             |
|           |            |              |                  |            |              |                  |            |              |                  |            |              |                  | 3        | 3.71         | 4                |                                             |
| 14        |            |              |                  | 0.5        | 2.03         | 1                | 1.5        | 2.214        | 0.8              | 1.5        | 2.441        | 2.2              | 1        | 3.06         | 5                | 0.922                                       |
|           |            |              |                  |            |              |                  |            |              |                  |            |              |                  | 3        | 3.47         | 2                |                                             |
|           |            |              |                  |            |              |                  |            |              |                  |            |              |                  | 3        | 3.71         | 4                |                                             |
| 15        |            |              |                  |            |              |                  | 1.5        | 2.209        | 0.3              | 1.5        | 2.433        | 2.9              | 1        | 3.06         | 6                | 0.952                                       |
|           |            |              |                  |            |              |                  |            |              |                  |            |              |                  | 3        | 3.47         | 2                |                                             |
|           |            |              |                  |            |              |                  |            |              |                  |            |              |                  | 3        | 3.71         | 4                |                                             |

<sup>a</sup> Fourier-transformed range:  $k = 2-15 \text{ \AA}^{-1}$  (resolution 0.12 Å).  $r$  is in units Å,  $\Delta\sigma^2$  in  $10^3 \text{ \AA}^2$ . The typical error of analysis for interatomic distances ( $r$ ) is approximately  $\pm 0.02 \text{ \AA}$ . <sup>b</sup> Back-transformation range:  $r' = 0.60-3.80 \text{ \AA}$ . <sup>c</sup> Fits to unfiltered data corresponding to the best fits to filtered data.



**Table S5.** EXAFS fitting results for a second sample of [PhBP<sup>iPr</sup><sub>3</sub>]Fe(N), **4 (4B)**, [Fe] = 0.03 M).<sup>a</sup>

| Fit       | Fe-N       |              |                  | Fe-N       |              |                  | Fe-P       |              |                  | Fe-P       |              |                  | Fe...C   |              |                  | GOF<br>$\epsilon^2 \cdot 10^3$ <sup>b</sup> |
|-----------|------------|--------------|------------------|------------|--------------|------------------|------------|--------------|------------------|------------|--------------|------------------|----------|--------------|------------------|---------------------------------------------|
|           | <i>n</i>   | <i>r</i> (Å) | $\Delta\sigma^2$ | <i>n</i> | <i>r</i> (Å) | $\Delta\sigma^2$ |                                             |
| 1         |            |              |                  |            |              |                  |            |              |                  | 3          | 2.34         | 19               |          |              |                  | 1.087                                       |
| 3         |            |              |                  |            |              |                  | 1.5        | 2.235        | 2.2              | 1.5        | 2.429        | 1.6              |          |              |                  | 0.656                                       |
| 5         | 0.8        | 1.513        | 9                |            |              |                  | 1.5        | 2.233        | 2.2              | 1.5        | 2.428        | 1.7              |          |              |                  | 0.684                                       |
| 6         | 0.5        | 1.529        | 2.9              |            |              |                  | 1.5        | 2.234        | 2.1              | 1.5        | 2.428        | 1.6              |          |              |                  | 0.601                                       |
| 8         |            |              |                  | 0.5        | 1.824        | -0.6             | 1.5        | 2.239        | 2.7              | 1.5        | 2.434        | 1.8              |          |              |                  | 0.685                                       |
| <b>9</b>  | <b>0.5</b> | <b>1.535</b> | <b>3.7</b>       | <b>0.5</b> | <b>1.819</b> | <b>-0.2</b>      | <b>1.5</b> | <b>2.238</b> | <b>2.5</b>       | <b>1.5</b> | <b>2.433</b> | <b>1.7</b>       |          |              |                  | <b>0.524</b>                                |
| 10        | 0.45       | 1.538        | 2.6              | 0.55       | 1.824        | 1.2              | 1.35       | 2.231        | 1.6              | 1.65       | 2.426        | 2.5              |          |              |                  | 0.512                                       |
| 11        | 0.4        | 1.541        | 1.3              | 0.6        | 1.836        | 4                | 1.2        | 2.225        | 0.7              | 1.8        | 2.419        | 3.3              |          |              |                  | 0.498                                       |
| <b>12</b> | <b>0.5</b> | <b>1.535</b> | <b>3.8</b>       | <b>0.5</b> | <b>1.820</b> | <b>-0.2</b>      | <b>1.5</b> | <b>2.237</b> | <b>2.4</b>       | <b>1.5</b> | <b>2.432</b> | <b>1.7</b>       | <b>1</b> | <b>3.12</b>  | <b>0</b>         | <b>0.559</b>                                |
|           |            |              |                  |            |              |                  |            |              |                  |            |              |                  | <b>3</b> | <b>3.47</b>  | <b>6</b>         |                                             |
|           |            |              |                  |            |              |                  |            |              |                  |            |              |                  | <b>3</b> | <b>3.73</b>  | <b>6</b>         |                                             |
| (12)      | 0.5        | 1.535        | 3.7              | 0.5        | 1.817        | -0.3             | 1.5        | 2.240        | 2.6              | 1.5        | 2.435        | 1.6              | 1        | 3.113        | 1.1              | 0.551) <sup>c</sup>                         |
|           |            |              |                  |            |              |                  |            |              |                  |            |              |                  | 3        | 3.490        | 6.9              |                                             |
|           |            |              |                  |            |              |                  |            |              |                  |            |              |                  | 3        | 3.743        | 6.4              |                                             |
| 13        | 0.5        | 1.528        | 3.0              |            |              |                  | 1.5        | 2.234        | 2.0              | 1.5        | 2.428        | 1.5              | 1        | 3.12         | 0                | 0.657                                       |
|           |            |              |                  |            |              |                  |            |              |                  |            |              |                  | 3        | 3.48         | 6                |                                             |
|           |            |              |                  |            |              |                  |            |              |                  |            |              |                  | 3        | 3.73         | 6                |                                             |
| 14        |            |              |                  | 0.5        | 1.826        | -0.6             | 1.5        | 2.238        | 2.6              | 1.5        | 2.433        | 1.7              | 1        | 3.12         | 0                | 0.751                                       |
|           |            |              |                  |            |              |                  |            |              |                  |            |              |                  | 3        | 3.47         | 6                |                                             |
|           |            |              |                  |            |              |                  |            |              |                  |            |              |                  | 3        | 3.73         | 6                |                                             |
| 15        |            |              |                  |            |              |                  | 1.5        | 2.234        | 2.1              | 1.5        | 2.429        | 1.6              | 1        | 3.12         | 0                | 0.709                                       |
|           |            |              |                  |            |              |                  |            |              |                  |            |              |                  | 3        | 3.48         | 6                |                                             |
|           |            |              |                  |            |              |                  |            |              |                  |            |              |                  | 3        | 3.73         | 6                |                                             |

<sup>a</sup> Fourier-transformed range:  $k = 2-15 \text{ \AA}^{-1}$  (resolution 0.12 Å).  $r$  is in units Å,  $\Delta\sigma^2$  in  $10^3 \text{ \AA}^2$ . The typical error of analysis for interatomic distances ( $r$ ) is approximately  $\pm 0.02 \text{ \AA}$ . <sup>b</sup> Back-transformation range:  $r' = 0.60-3.80 \text{ \AA}$ . <sup>c</sup> Fits to unfiltered data corresponding to the best fits to filtered data.

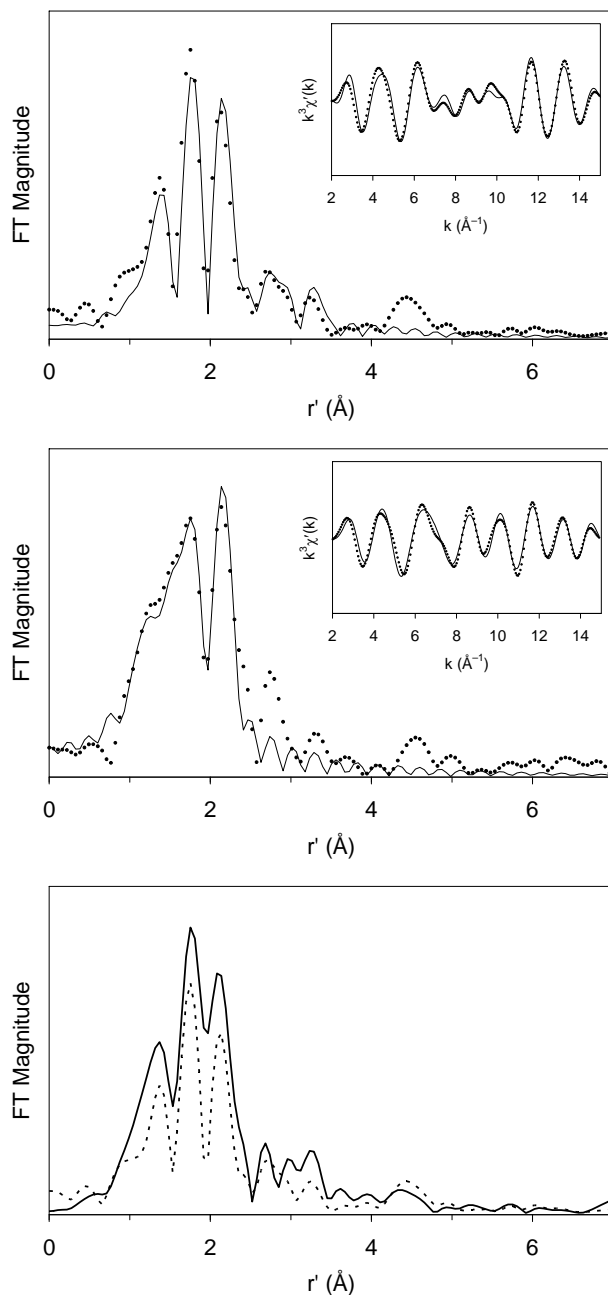

**Figure S5.** Fourier transforms of the Fe K-edge EXAFS data ( $k^3\chi(k)$ ) and Fourier-filtered EXAFS spectra ( $k^3\chi'(k)$ , inset) of additional samples of  $[\text{PhBP}^{\text{Pr}}_3]\text{Fe}(\text{N})$ , **4** ( $[\text{Fe}] = 0.03 \text{ M}$ ); top, **4B**, Fourier-transformed range  $k = 2\text{--}15 \text{ \AA}^{-1}$ ; experimental data ( $\bullet\bullet$ ) and fit 12, Table S5 (—); Back-transformation range:  $r' = 0.60\text{--}3.80 \text{ \AA}$ ; middle, **4C**, Fourier-transformed range  $k = 2\text{--}14.9 \text{ \AA}^{-1}$ ; experimental data ( $\bullet\bullet$ ) and fit 4c, Table 2 (—); Back-transformation range:  $r' = 0.60\text{--}3.60 \text{ \AA}$ ; bottom, comparison of the Fourier transforms of the Fe K-edge EXAFS data ( $k^3\chi(k)$ ) of samples **4A** (—,  $[\text{Fe}] = 0.01 \text{ M}$ ) and **4B** (---,  $[\text{Fe}] = 0.03 \text{ M}$ ).

**Table S6.** EXAFS fitting results for a sample of [PhBP<sup>CH<sub>2</sub>Cy</sup><sub>3</sub>]Fe(N), **5** ([Fe] = 0.035 M).<sup>a</sup>

| Fit       | Fe-N     |              |            | Fe-P     |              |            | GOF <sup>b</sup> |
|-----------|----------|--------------|------------|----------|--------------|------------|------------------|
|           | <i>n</i> | <i>r</i> (Å) | $\sigma^2$ | <i>n</i> | <i>r</i> (Å) | $\sigma^2$ |                  |
| 1         |          |              |            | 5        | 2.18         | 6.0        | 0.547            |
| 2         |          |              |            | 4        | 2.18         | 4.1        | 0.512            |
| 3         |          |              |            | 3        | 2.19         | 2.3        | 0.486            |
| 4         |          |              |            | 2        | 2.19         | 0.6        | 0.472            |
| 5         | 1        | 1.56         | 7.9        | 4        | 2.19         | 4.2        | 0.649            |
| 6         | 1        | 1.55         | 8.1        | 3        | 2.19         | 2.4        | 0.548            |
| <b>7</b>  | <b>1</b> | <b>1.55</b>  | <b>7.4</b> | <b>2</b> | <b>2.19</b>  | <b>0.6</b> | <b>0.455</b>     |
| 8         | 0.8      | 1.56         | 4.2        | 2        | 2.19         | 0.6        | 0.452            |
| 9         | 0.7      | 1.55         | 3.8        | 2.1      | 2.19         | 0.8        | 0.458            |
| 10        | 0.8      | 1.56         | 4.7        | 2.4      | 2.19         | 1.3        | 0.486            |
|           |          |              |            |          |              |            | GOF <sup>b</sup> |
| 11        |          |              |            | 4        | 2.19         | 4.2        | 0.962            |
| 12        |          |              |            | 3        | 2.19         | 3.9        | 0.653            |
| 13        |          |              |            | 2        | 2.18         | 3.2        | 0.483            |
| 14        | 1        | 1.55         | 8.1        | 3        | 2.19         | 2.4        | 0.470            |
| <b>15</b> | <b>1</b> | <b>1.56</b>  | <b>7.7</b> | <b>2</b> | <b>2.19</b>  | <b>0.6</b> | <b>0.340</b>     |
| 16        | 0.8      | 1.55         | 6.8        | 2        | 2.19         | 1.3        | 0.325            |

<sup>a</sup> Fourier-transformed range:  $k = 2-15 \text{ \AA}^{-1}$  (resolution 0.12 Å).  $r$  is in units Å,  $\sigma^2$  in  $10^3 \text{ \AA}^2$ . The typical error of analysis for interatomic distances ( $r$ ) is approximately  $\pm 0.02 \text{ \AA}$ . <sup>b</sup> GOF =  $[\sum k^6(\chi_{\text{exptl}} - \chi_{\text{sim}})^2 / \sum k^6 \chi_{\text{exptl}}^2]^{1/2}$ . Fits 1–10 are to unfiltered  $k^3\chi(k)$  EXAFS data, fits 11–16 to unfiltered  $k\chi(k)$  EXAFS data.
